# Supplementary material for: On obesogenic diet exposure of parents and sex-specific programming of overweight in mouse offspring
Source: Research Square preprint supplement (doi:10.21203/rs.3.rs-3491044/v1), 2023-11-01
Supplement: Supplementary file 2 [file 10a0c432a55df9daa6df22a4.xlsx]

## Sheet: Sheet 1
ID
